# Supplementary material for: All Trans-Retinoic Acids Facilitate the Remodeling of 2D and 3D Cultured Human Conjunctival Fibroblasts
Source: MDPI journal article supplement (doi:10.3390/bioengineering9090463), 2022-09-11
Supplement: s1 [file s1]

**Table S1.** Sequences of primers used in qPCR.

|                    |         | Sequence                                               | Exon Location | RefSeq Number |
|--------------------|---------|--------------------------------------------------------|---------------|---------------|
| human              | Probe   | 5'-/56-FAM/CCCTGTCTT/ZEN/CCCTGGG-CATCAC/3IABkFQ/-3'    | 2-3           | NM_001002     |
| RPLP0              | Primer2 | 5'-TCGTCTTTAAACCCTGCGTG-3'                             |               |               |
|                    | Primer1 | 5'-TGTCTGCTCCCACAATGAAAC-3'                            |               |               |
| human              | Probe   | 5'-/56-FAM/TCGAGGGCC/ZEN/AAGACGAAGA-CATC/3IABkFQ/-3'   | 1-2           | NM_000088     |
| COL1A1             | Primer2 | 5'-GACATGTTGAGCTTTGTGGAC-3'                            |               |               |
|                    | Primer1 | 5'-TTCTGTACGCAGGTGATTGG-3'                             |               |               |
| human              | Probe   | 5'-/56-FAM/TCATACAGA/ZEN/CTTGG-CAGCGGCT/3IABkFQ/-3'    | 51-52         | NM_001845     |
| COL4A1             | Primer2 | 5'-AGAGAGGAGCGAGATGTTCA-3'                             |               |               |
|                    | Primer1 | 5'-TGAGTCAGGCTTCATTATGTTCT-3'                          |               |               |
| human              | Primer2 | 5'-CCTCGTGGACAAAGTCAAGT-3'                             | 2-3           | NM_001848     |
| COL6A1             | Primer1 | 5'-GTGAGGCCTTGGATGATCTC-3'                             |               |               |
| human FN1          | Primer2 | 5'-CGTCCTAAAGACTCCATGATCTG-3'                          | 3-4           | NM_212482     |
|                    | Primer1 | 5'-ACCAATCTTGTAGGACTGACC-3'                            |               |               |
| human $\alpha$ SMA | Probe   | 5'-/56-FAM/AGACCCTGT/ZEN/TCCAGCCATCCTTC/3IABkFQ/-3'    | 8-9           | NM_001613     |
|                    | Primer2 | 5'-AGAGTTACGAGTTGCCTGATG-3'                            |               |               |
|                    | Primer1 | 5'-CTGTTGTAGGTGGTTTCATGGA-3'                           |               |               |
| human              | Probe   | 5'-/56-FAM/TCAACCAGA/ZEN/CCACCTTATAC-CAGCG/3IABkFQ/-3' | 2-4           | NM_003254     |
| TIMP1              | Primer2 | 5'-CCTTCTGCAATTCCGACCT-3'                              |               |               |
|                    | Primer1 | 5'-GCTTGGAACCTTTATACATCTTG-3'                          |               |               |
| human              | Probe   | 5'-/56-FAM/TCTCATTGC/ZEN/AG-GAAAGGCCGAGG/3IABkFQ/-3'   | 3-4           | NM_003255     |
| TIMP2              | Primer2 | 5'-GACGTTGGAGGAAAGAAGGA-3'                             |               |               |
|                    | Primer1 | 5'-TGTGGTTCAGGCTCTTCTTC-3'                             |               |               |
| human              | Probe   | 5'-/56-FAM/CCTCCTTTA/ZEN/CCAGCTTCTTCCCCAC/3IABkFQ/-3'  | 1-3           | NM_000362     |
| TIMP3              | Primer2 | 5'-CCTTCTGCAACTCCGACATC-3'                             |               |               |
|                    | Primer1 | 5'-CGGTACATCTTCATCTGCTTGA-3'                           |               |               |
| human              | Probe   | 5'-/56-FAM/ACTGAGGAC/ZEN/CTGACCAGTCAA-GAGA/3IABkFQ/-3' | 3-4           | NM_003256     |
| TIMP4              | Primer2 | 5'-GGTTTGAGAAAGTCAAGGATGTTTC-3'                        |               |               |
|                    | Primer1 | 5'-GTTGCACAGATGGATGAAGAC-3'                            |               |               |
| human              | Primer2 | 5'-TCCACCACCTACAACCTTGAG-3'                            | 6-7           | NM_004530     |
| MMP2               | Primer1 | 5'-GTGCAGCTGTCATAGGATGT-3'                             |               |               |
| human              | Primer2 | 5'-ACATCGTCATCCAGTTTGGTG-3'                            | 3-4           | NM_004994     |
| MMP9               | Primer1 | 5'-CGTCGAAATGGGCGTCT-3'                                |               |               |
| human              | Primer2 | 5'-TTCGCCGACTAAGCAGAAG-3'                              | 1-1           | NM_004995     |
| MMP14              | Primer1 | 5'-CTTGAATTCCTAGACCGCTGT-3'                            |               |               |
| human              | Forward | 5'-CATCACGCCGTCCTATGTCTG-3'                            |               | NM_005347     |
| GRP78              | Reverse | 5'-CGTCAAAGACCGTGTCTCTCG-3'                            |               |               |
| human              | Forward | 5'-CTGGGACTGGGAACCTTATGAATG-3'                         |               | NM_003299     |
| GRP94              | Reverse | 5'-TCCATATTCGTCAAACAGACCAC-3'                          |               |               |

|               |         |                              |           |
|---------------|---------|------------------------------|-----------|
| human sXBP    | Forward | 5'-GGTCTGCTGAGTCCGCAGCAGG-3' | AB076384  |
|               | Reverse | 5'-GGGCTTGGTATATATGTGG-3'    |           |
| human tXBP    | Forward | 5'-AGTAGCAGCTCAGACTGCCA-3'   | NM_005080 |
|               | Reverse | 5'-CCTGGTTCTCAACTACAAGGC-3'  |           |
| human<br>CHOP | Forward | 5'-GGAGAACCAGGAAACGGAAAC-3'  | NM_004083 |
|               | Reverse | 5'-TCTCCTTCATGCGCTGCTTT-3'   |           |

---
